# Supplementary material for: An online atlas of human plasma metabolite signatures of gut microbiome composition
Source: PubMed Central journal article supplement (PMC9508139; doi:10.1038/s41467-022-33050-0), 2022-09-23
Supplement: 41467_2022_33050_MOESM15_ESM.pdf [file 41467_2022_33050_MOESM15_ESM.pdf]

## Reporting Summary

Nature Portfolio wishes to improve the reproducibility of the work that we publish. This form provides structure for consistency and transparency in reporting. For further information on Nature Portfolio policies, see our [Editorial Policies](#) and the [Editorial Policy Checklist](#).

### Statistics

For all statistical analyses, confirm that the following items are present in the figure legend, table legend, main text, or Methods section.

n/a Confirmed

- |                                     |                                     |                                                                                                                                                                                                                                                            |
|-------------------------------------|-------------------------------------|------------------------------------------------------------------------------------------------------------------------------------------------------------------------------------------------------------------------------------------------------------|
| <input type="checkbox"/>            | <input checked="" type="checkbox"/> | The exact sample size ( $n$ ) for each experimental group/condition, given as a discrete number and unit of measurement                                                                                                                                    |
| <input type="checkbox"/>            | <input checked="" type="checkbox"/> | A statement on whether measurements were taken from distinct samples or whether the same sample was measured repeatedly                                                                                                                                    |
| <input type="checkbox"/>            | <input checked="" type="checkbox"/> | The statistical test(s) used AND whether they are one- or two-sided<br><i>Only common tests should be described solely by name; describe more complex techniques in the Methods section.</i>                                                               |
| <input type="checkbox"/>            | <input checked="" type="checkbox"/> | A description of all covariates tested                                                                                                                                                                                                                     |
| <input type="checkbox"/>            | <input checked="" type="checkbox"/> | A description of any assumptions or corrections, such as tests of normality and adjustment for multiple comparisons                                                                                                                                        |
| <input type="checkbox"/>            | <input checked="" type="checkbox"/> | A full description of the statistical parameters including central tendency (e.g. means) or other basic estimates (e.g. regression coefficient) AND variation (e.g. standard deviation) or associated estimates of uncertainty (e.g. confidence intervals) |
| <input type="checkbox"/>            | <input checked="" type="checkbox"/> | For null hypothesis testing, the test statistic (e.g. $F$ , $t$ , $r$ ) with confidence intervals, effect sizes, degrees of freedom and $P$ value noted<br><i>Give <math>P</math> values as exact values whenever suitable.</i>                            |
| <input checked="" type="checkbox"/> | <input type="checkbox"/>            | For Bayesian analysis, information on the choice of priors and Markov chain Monte Carlo settings                                                                                                                                                           |
| <input checked="" type="checkbox"/> | <input type="checkbox"/>            | For hierarchical and complex designs, identification of the appropriate level for tests and full reporting of outcomes                                                                                                                                     |
| <input type="checkbox"/>            | <input checked="" type="checkbox"/> | Estimates of effect sizes (e.g. Cohen's $d$ , Pearson's $r$ ), indicating how they were calculated                                                                                                                                                         |

*Our web collection on [statistics for biologists](#) contains articles on many of the points above.*

### Software and code

Policy information about [availability of computer code](#)

Data collection For the collection of the metagenomic sequencing data the following software was used: Bowtie 2 v02.3.2, MEGAHIT v. 1.1.1.1, BWA mem v 0.7.16a and EggNOG-mapper v2.0.1.

Data analysis All analyses were performed using R v4.1.1. R packages used: vegan v2.5-7, ppcor v1.1, glmnet v4.1-3 and fgsea v1.19.2. Code related to the analyses in this study are available at [https://github.com/MolEpicUU/GUTSY\\_Atlas](https://github.com/MolEpicUU/GUTSY_Atlas).

For manuscripts utilizing custom algorithms or software that are central to the research but not yet described in published literature, software must be made available to editors and reviewers. We strongly encourage code deposition in a community repository (e.g. GitHub). See the Nature Portfolio [guidelines for submitting code & software](#) for further information.

### Data

Policy information about [availability of data](#)

All manuscripts must include a [data availability statement](#). This statement should provide the following information, where applicable:

- Accession codes, unique identifiers, or web links for publicly available datasets
- A description of any restrictions on data availability
- For clinical datasets or third party data, please ensure that the statement adheres to our [policy](#)

De-hosted anonymized metagenomic sequencing data generated in this study have been deposited in the European Nucleotide Archive under accession number PRJEB51353 (<https://www.ebi.ac.uk/ena/browser/view/prjeb51353>). Metabolomics analysis was performed at Metabolon, TX, USA, who deposited spectral data from the first analytical stage (MS1) for 125 anonymized samples from SCAPIS-Uppsala in MetaboLights under accession number MTBLS407 (<https://www.ebi.ac.uk/metabolights/MTBLS407>). However, MS/MS spectral data are not shared by Metabolon to the research community. Additional individual-level data are available under restricted access as they contain sensitive personal information that are protected under privacy laws, and access can be obtained following ethical approval

from the Swedish Ethical Review Board (<https://etikprovningmyndigheten.se/>; the application procedure and instructions are provided in the link) and data access approval from the SCAPIS Data access board (<https://www.scapis.org/data-access/>; the application procedure and conditions are provided in the link). These data may only be used for research, and are not available for commercial use. Underlying data for all figures are provided in the Source Data file and available at [https://github.com/MolEpicUU/GUTSY\\_Atlas](https://github.com/MolEpicUU/GUTSY_Atlas). A companion website to the article containing the full results of the current study and further study-related searchable material can be accessed via <https://gutsyatlas.serve.scilifelab.se/>.

## Field-specific reporting

Please select the one below that is the best fit for your research. If you are not sure, read the appropriate sections before making your selection.

Life sciences  Behavioural & social sciences  Ecological, evolutionary & environmental sciences

For a reference copy of the document with all sections, see [nature.com/documents/nr-reporting-summary-flat.pdf](https://nature.com/documents/nr-reporting-summary-flat.pdf)

## Life sciences study design

All studies must disclose on these points even when the disclosure is negative.

|                 |                                                                                                                                                                                                                                                                                                                                                                                                                                                                                                                                                                                                                                                                                                                                                                                                                                                                                                                                                                                                   |
|-----------------|---------------------------------------------------------------------------------------------------------------------------------------------------------------------------------------------------------------------------------------------------------------------------------------------------------------------------------------------------------------------------------------------------------------------------------------------------------------------------------------------------------------------------------------------------------------------------------------------------------------------------------------------------------------------------------------------------------------------------------------------------------------------------------------------------------------------------------------------------------------------------------------------------------------------------------------------------------------------------------------------------|
| Sample size     | All SCAPIS Uppsala and Malmö samples with complete metagenomic sequencing data, plasma metabolite profiling data and main model covariates were used (n = 8,583). No power calculations were done, but similar previous studies with a fraction of the samples were successful in finding significant associations.                                                                                                                                                                                                                                                                                                                                                                                                                                                                                                                                                                                                                                                                               |
| Data exclusions | During the metagenomic sequencing measurement, 12 samples were excluded as they provided a low DNA yield and/or had features interfering with the library preparation even after one attempt of re-extraction each. Furthermore, one sample with only 1,473 reads mapped to the signature genes was removed after sequencing. For the metabolomics profiling, two samples were lost during processing, two samples were excluded whose data were determined to be outliers based on principal component analysis, and one sample was excluded based on clearly discordant levels of glucose, cholesterol and creatinine compared to the reference laboratory measurement. Finally, 33 individuals with missing main model covariates were removed. Species with at least 100 non-zero measurements and metabolites with at least 100 values above the detection threshold were included in the present study. These exclusion/inclusion criteria were established before analyses were performed. |
| Replication     | We did not include any new replication data.                                                                                                                                                                                                                                                                                                                                                                                                                                                                                                                                                                                                                                                                                                                                                                                                                                                                                                                                                      |
| Randomization   | This is not relevant to our study, because we did not perform any group based analysis.                                                                                                                                                                                                                                                                                                                                                                                                                                                                                                                                                                                                                                                                                                                                                                                                                                                                                                           |
| Blinding        | This is not relevant to our study, because we did not perform any group based analysis.                                                                                                                                                                                                                                                                                                                                                                                                                                                                                                                                                                                                                                                                                                                                                                                                                                                                                                           |

## Reporting for specific materials, systems and methods

We require information from authors about some types of materials, experimental systems and methods used in many studies. Here, indicate whether each material, system or method listed is relevant to your study. If you are not sure if a list item applies to your research, read the appropriate section before selecting a response.

### Materials & experimental systems

| n/a                                 | Involvement in the study                                        |
|-------------------------------------|-----------------------------------------------------------------|
| <input checked="" type="checkbox"/> | <input type="checkbox"/> Antibodies                             |
| <input checked="" type="checkbox"/> | <input type="checkbox"/> Eukaryotic cell lines                  |
| <input checked="" type="checkbox"/> | <input type="checkbox"/> Palaeontology and archaeology          |
| <input checked="" type="checkbox"/> | <input type="checkbox"/> Animals and other organisms            |
| <input type="checkbox"/>            | <input checked="" type="checkbox"/> Human research participants |
| <input checked="" type="checkbox"/> | <input type="checkbox"/> Clinical data                          |
| <input checked="" type="checkbox"/> | <input type="checkbox"/> Dual use research of concern           |

### Methods

| n/a                                 | Involvement in the study                        |
|-------------------------------------|-------------------------------------------------|
| <input checked="" type="checkbox"/> | <input type="checkbox"/> ChIP-seq               |
| <input checked="" type="checkbox"/> | <input type="checkbox"/> Flow cytometry         |
| <input checked="" type="checkbox"/> | <input type="checkbox"/> MRI-based neuroimaging |

## Human research participants

Policy information about [studies involving human research participants](#)

### Population characteristics

Table 1 describes the main sociodemographic and clinical characteristics of the Malmö and Uppsala SCAPIS study sites included in the current study. Included are; age, sex, place of birth, body mass index, systolic blood pressure, estimated glomerular filtration rate, current smoking status, fiber intake, coffee intake, antibiotics prescriptions, blood pressure, lipid-lowering and diabetes medication, and metformin and omeprazole prescriptions.

### Recruitment

SCAPIS is a prospective population-based study of 30,154 men and women, aged 50–65 years, living in six municipality regions in Sweden. It was designed with the main aim to improve risk prediction and understanding of cardiovascular disease, chronic pulmonary obstructive disease, and related metabolic disorders. After a pilot study in 2012, recruitment was initiated in 2014 and completed in 2018. Individuals were randomly recruited from the population register, with a participation rate of 50%. The present study is based on the data for 11,287 participants from the test centers in Malmö (n = 6,251) and Uppsala (n = 5,036).

From Bergström et al. Journal of Internal Medicine (2015):

#### Recruitment

All Swedish residents have a unique personal identification number (PIN), which allows unbiased and randomized recruitment from the Swedish population register, almost complete follow-up, and linkage to registries with information on hospitalizations, living conditions and social welfare ([www.socialstyrelsen.se/statistics](http://www.socialstyrelsen.se/statistics), [www.scb.se/en\\_](http://www.scb.se/en_)). Initial contact is made by sending out an informational brochure asking the recipient to contact the study centre via telephone, e-mail or letter. If the centre is not contacted, the recipient is reminded by up to three telephone calls (including one in the evening) and finally by letter. If the centre is contacted and the subject is willing to participate in the study, an appointment is arranged at the study centre. No exclusion criteria are applied except the inability to understand written and spoken Swedish for informed consent. No reimbursement is provided for travel expenses or loss of income. To improve recruitment, the study is advertised in local newspapers and on television. Employers in the catchment areas are targeted to encourage study participation with paid leave.

#### Participation rates [in pilot of 1,111 individuals]

The overall participation rate was 49.5% (39.9% and 67.8% in areas of low and high socio-economic status, respectively). Reasons for nonparticipation were as follows: inability to make contact with the subject (37.4%), too busy (15.7%), too sick (6.6%), language difficulties (7.8%), miscellaneous (6.4%) and none given (26.1%). Lack of contact and language difficulties dominated in areas of low socio-economic status.

We think this has a limited effect on our results.

### Ethics oversight

All study participants provided a signed informed consent at the first site visit. The study adheres to the Declaration of Helsinki and was approved by the Swedish Ethics Review Authority (Etikprövningsmyndigheten Dnr 2010-228-31M, Dnr 2018-315).

Note that full information on the approval of the study protocol must also be provided in the manuscript.
